# Supplementary material
Source: PubMed Central journal article supplement (PMC4528479)
Supplement: rsbl20150310supp1.pdf [file rsbl20150310supp1.pdf]

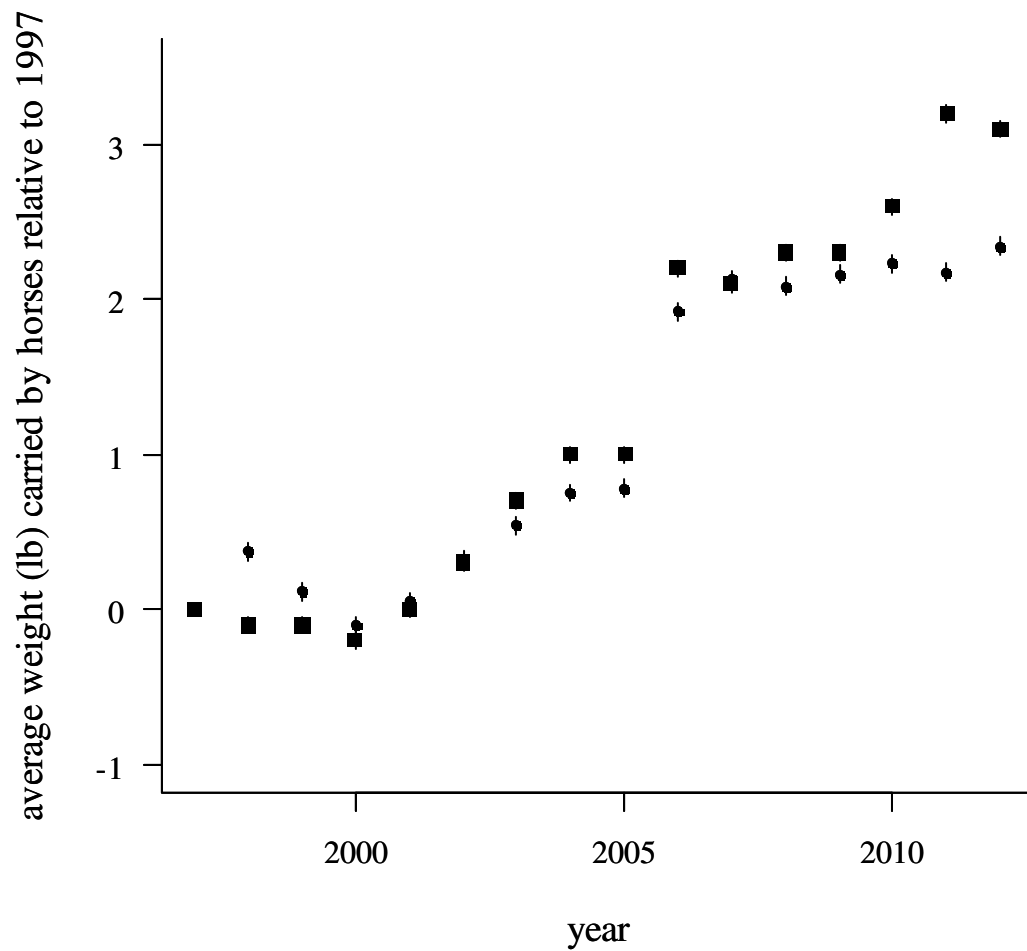

Supplementary Figure 1. Patterns of temporal change in average weight carried by runners in elite (circle) and all race classes (square) since 1997. Estimated year effects are relative to the mean in 1997 with error bars showing  $\pm 1$  standard error.
