# Supplementary material
Source: PubMed Central journal article supplement (PMC4528479)
Supplement: rsbl20150310supp2.pdf [file rsbl20150310supp2.pdf]

Supplementary Table 1: Estimates of fixed effects with Model 2 fitted to each dataset. Temporal variation was modelled here by including year as a multilevel factor. Effects are considered nominally significant at  $P < 0.05$  for  $|Z| > 1.96$ .

| Dataset                                     | Effect                            | Estimate (3d.p) $\pm$ SE (3d.p)         | z-statistic |
|---------------------------------------------|-----------------------------------|-----------------------------------------|-------------|
| 2.1) Winning times of elite races 1850-2012 | <i>distance(yards).no_runners</i> | $2 \times 10^{-5} \pm 2 \times 10^{-6}$ | 9.50        |
|                                             | <i>distance(yards).going</i>      | $5 \times 10^{-7} \pm 9 \times 10^{-6}$ | 0.06        |
|                                             | <i>course</i>                     |                                         |             |
|                                             | 11                                | $-1.406 \pm 0.138$                      | -10.20      |
|                                             | 12                                | $-1.075 \pm 0.137$                      | -7.85       |
|                                             | 33                                | $-1.157 \pm 0.138$                      | -8.40       |
|                                             | 13                                | $-1.174 \pm 0.139$                      | -8.46       |
|                                             | 16                                | $-1.618 \pm 0.137$                      | -11.83      |
|                                             | 10                                | $-1.174 \pm 0.136$                      | -8.62       |
|                                             | 32                                | $-1.506 \pm 0.137$                      | -10.98      |
|                                             | 23                                | $-1.680 \pm 0.139$                      | -12.06      |
|                                             | 29                                | $-1.381 \pm 0.138$                      | -10.01      |
|                                             | 28                                | $-1.458 \pm 0.140$                      | -10.41      |
|                                             | 6                                 | $-1.605 \pm 0.147$                      | -10.89      |
|                                             | 26                                | $-1.384 \pm 0.368$                      | -3.76       |
|                                             | 19                                | $-1.908 \pm 0.477$                      | -4.00       |
|                                             | 15                                | $-1.179 \pm 0.187$                      | -6.30       |
|                                             | 2                                 | $-1.329 \pm 0.144$                      | -9.23       |
|                                             | 9                                 | $-1.424 \pm 0.168$                      | -8.48       |
|                                             | 24                                | $-1.382 \pm 0.174$                      | -7.93       |
|                                             | 21                                | $-0.889 \pm 0.292$                      | -3.05       |
|                                             | 35                                | $-1.419 \pm 0.186$                      | -7.65       |
|                                             | 27                                | $-1.586 \pm 0.284$                      | -5.58       |
|                                             | 1                                 | $-1.866 \pm 0.188$                      | -9.93       |
|                                             | <i>timing_method</i>              |                                         |             |
|                                             | Hand                              | $0 \pm 0$                               |             |
|                                             | Automated                         | $-0.115 \pm 0.032$                      | -3.59       |
|                                             | <i>sex</i>                        |                                         |             |
|                                             | Male                              | $0 \pm 0$                               |             |
|                                             | Female                            | $-0.043 \pm 0.016$                      | -2.59       |
|                                             | <i>age (years)</i>                |                                         |             |
|                                             | 2                                 | $0 \pm 0$                               |             |
|                                             | 3                                 | $0.125 \pm 0.021$                       | 5.88        |
|                                             | 4                                 | $0.226 \pm 0.025$                       | 9.09        |
|                                             | 5                                 | $0.198 \pm 0.030$                       | 6.69        |
|                                             | 6                                 | $0.197 \pm 0.042$                       | 4.71        |
|                                             | 7                                 | $0.265 \pm 0.061$                       | 4.36        |
|                                             | 8                                 | $0.290 \pm 0.083$                       | 3.48        |
|                                             | 9                                 | $0.357 \pm 0.190$                       | 1.89        |
|                                             | 10                                | $0.091 \pm 0.179$                       | 0.51        |
|                                             | <i>going<sup>2</sup></i>          | $-0.076 \pm 0.005$                      | -14.70      |
|                                             | <i>going</i>                      | $0.268 \pm 0.012$                       | 22.91       |
|                                             | <i>no_runners<sup>2</sup></i>     | $-0.002 \pm 2 \times 10^{-4}$           | -7.47       |

|  |                                          |                                           |       |
|--|------------------------------------------|-------------------------------------------|-------|
|  | <i>no_runners</i>                        | $0.003 \pm 0.003$                         | 1.07  |
|  | <i>distance(yards)</i> <sup>2</sup>      | $4 \times 10^{-8} \pm 3 \times 10^{-8}$   | 1.50  |
|  | <i>distance(yards)</i>                   | $5 \times 10^{-4} \pm 9 \times 10^{-5}$   | -5.32 |
|  | <i>year.distance(yards)</i> <sup>2</sup> | $9 \times 10^{-10} \pm 2 \times 10^{-10}$ | 4.27  |
|  | <i>year.distance(yards)</i>              | $4 \times 10^{-6} \pm 7 \times 10^{-7}$   | -6.14 |
|  | <i>year</i>                              |                                           |       |
|  | 1850                                     | $0 \pm 0$                                 |       |
|  | 1851                                     | $-0.344 \pm 0.135$                        | -2.55 |
|  | 1853                                     | $-0.353 \pm 0.137$                        | -2.58 |
|  | 1855                                     | $-0.235 \pm 0.134$                        | -1.76 |
|  | 1860                                     | $-0.247 \pm 0.138$                        | -1.79 |
|  | 1861                                     | $0.080 \pm 0.134$                         | 0.60  |
|  | 1876                                     | $-0.329 \pm 0.164$                        | -2.01 |
|  | 1880                                     | $0.217 \pm 0.157$                         | 1.38  |
|  | 1885                                     | $-0.068 \pm 0.141$                        | -0.48 |
|  | 1895                                     | $0.567 \pm 0.149$                         | 3.80  |
|  | 1900                                     | $0.889 \pm 0.138$                         | 6.46  |
|  | 1903                                     | $0.657 \pm 0.128$                         | 5.14  |
|  | 1910                                     | $1.086 \pm 0.128$                         | 8.49  |
|  | 1919                                     | $1.195 \pm 0.123$                         | 9.75  |
|  | 1920                                     | $1.014 \pm 0.148$                         | 6.84  |
|  | 1930                                     | $1.219 \pm 0.119$                         | 10.23 |
|  | 1933                                     | $1.406 \pm 0.120$                         | 11.76 |
|  | 1935                                     | $1.320 \pm 0.119$                         | 11.11 |
|  | 1938                                     | $1.455 \pm 0.121$                         | 12.05 |
|  | 1940                                     | $1.090 \pm 0.186$                         | 5.85  |
|  | 1946                                     | $1.099 \pm 0.120$                         | 9.14  |
|  | 1947                                     | $1.421 \pm 0.120$                         | 11.85 |
|  | 1948                                     | $1.388 \pm 0.119$                         | 11.63 |
|  | 1949                                     | $1.456 \pm 0.119$                         | 12.28 |
|  | 1950                                     | $1.240 \pm 0.118$                         | 10.47 |
|  | 1951                                     | $1.346 \pm 0.119$                         | 11.32 |
|  | 1952                                     | $1.218 \pm 0.120$                         | 10.16 |
|  | 1953                                     | $1.462 \pm 0.120$                         | 12.21 |
|  | 1954                                     | $1.221 \pm 0.118$                         | 10.32 |
|  | 1955                                     | $1.318 \pm 0.121$                         | 10.90 |
|  | 1956                                     | $1.381 \pm 0.120$                         | 11.55 |
|  | 1959                                     | $1.390 \pm 0.122$                         | 11.37 |
|  | 1960                                     | $1.558 \pm 0.120$                         | 12.95 |
|  | 1962                                     | $1.505 \pm 0.120$                         | 12.53 |
|  | 1963                                     | $1.457 \pm 0.121$                         | 12.09 |
|  | 1964                                     | $1.516 \pm 0.124$                         | 12.20 |
|  | 1966                                     | $1.545 \pm 0.121$                         | 12.79 |
|  | 1967                                     | $1.498 \pm 0.120$                         | 12.51 |
|  | 1969                                     | $1.355 \pm 0.120$                         | 11.27 |
|  | 1970                                     | $1.586 \pm 0.121$                         | 13.16 |
|  | 1971                                     | $1.644 \pm 0.122$                         | 13.50 |
|  | 1975                                     | $1.652 \pm 0.123$                         | 13.39 |
|  | 1980                                     | $1.786 \pm 0.124$                         | 14.39 |
|  | 1985                                     | $1.883 \pm 0.125$                         | 15.11 |

|                                             |                                   |                                         |        |
|---------------------------------------------|-----------------------------------|-----------------------------------------|--------|
|                                             | 1990                              | 2.082 ± 0.125                           | 16.70  |
|                                             | 1994                              | 2.060 ± 0.125                           | 16.48  |
|                                             | 1996                              | 2.125 ± 0.122                           | 17.38  |
|                                             | 1997                              | 2.077 ± 0.122                           | 17.01  |
|                                             | 1998                              | 2.073 ± 0.122                           | 16.96  |
|                                             | 1999                              | 2.159 ± 0.123                           | 17.55  |
|                                             | 2000                              | 2.038 ± 0.123                           | 16.57  |
|                                             | 2001                              | 2.033 ± 0.123                           | 16.56  |
|                                             | 2002                              | 2.145 ± 0.123                           | 17.48  |
|                                             | 2003                              | 2.123 ± 0.123                           | 17.33  |
|                                             | 2004                              | 2.103 ± 0.122                           | 17.20  |
|                                             | 2005                              | 2.209 ± 0.122                           | 18.06  |
|                                             | 2006                              | 2.219 ± 0.122                           | 18.16  |
|                                             | 2007                              | 2.225 ± 0.122                           | 18.19  |
|                                             | 2008                              | 2.191 ± 0.123                           | 17.84  |
|                                             | 2009                              | 2.218 ± 0.123                           | 18.11  |
|                                             | 2010                              | 2.273 ± 0.123                           | 18.51  |
|                                             | 2011                              | 2.223 ± 0.123                           | 18.09  |
|                                             | 2012                              | 2.256 ± 0.1233                          | 18.30  |
|                                             | <i>mu</i>                         | 17.69 ± 0.1763                          | 100.34 |
| 2.2) Winning times of elite races 1997-2012 | <i>distance(yards).no_runners</i> | 2x10 <sup>-6</sup> ± 4x10 <sup>-6</sup> | 0.49   |
|                                             | <i>distance(yards).going</i>      | 4x10 <sup>-5</sup> ± 1x10 <sup>-5</sup> | 3.19   |
|                                             | <i>course</i>                     |                                         |        |
|                                             | 10                                | 0 ± 0                                   |        |
|                                             | 11                                | -0.252 ± 0.030                          | -8.28  |
|                                             | 12                                | 0.003 ± 0.031                           | 0.11   |
|                                             | 13                                | -0.039 ± 0.038                          | -1.03  |
|                                             | 16                                | -0.454 ± 0.027                          | -16.79 |
|                                             | 23                                | -0.602 ± 0.037                          | -16.40 |
|                                             | 29                                | -0.198 ± 0.034                          | -5.89  |
|                                             | 33                                | -0.008 ± 0.036                          | -0.23  |
|                                             | 2                                 | -0.216 ± 0.050                          | -4.28  |
|                                             | 6                                 | -0.239 ± 0.073                          | -3.29  |
|                                             | 9                                 | -0.257 ± 0.084                          | -3.05  |
|                                             | 28                                | -0.355 ± 0.055                          | -6.50  |
|                                             | 32                                | -0.306 ± 0.045                          | -6.78  |
|                                             | 24                                | -0.093 ± 0.104                          | -0.90  |
|                                             | 21                                | 0.353 ± 0.227                           | 1.55   |
|                                             | 15                                | -0.001 ± 0.133                          | -0.01  |
|                                             | 35                                | -0.334 ± 0.107                          | -3.11  |
|                                             | 27                                | -0.338 ± 0.202                          | -1.68  |
|                                             | 1                                 | -0.682 ± 0.106                          | -6.44  |
|                                             | <i>timing_method</i>              |                                         |        |
|                                             | Automated                         | 0 ± 0                                   |        |
|                                             | Hand                              | -0.012 ± 0.145                          | -0.08  |
|                                             | <i>sex</i>                        |                                         |        |
|                                             | Male                              | 0 ± 0                                   |        |
|                                             | Female                            | -0.033 ± 0.019                          | -1.79  |
|                                             | <i>age (years)</i>                |                                         |        |
|                                             | 2                                 | 0 ± 0                                   |        |

|                                                    |                                          |                                          |        |
|----------------------------------------------------|------------------------------------------|------------------------------------------|--------|
|                                                    | 3                                        | 0.163 ± 0.025                            | 6.57   |
|                                                    | 4                                        | 0.240 ± 0.023                            | 8.94   |
|                                                    | 5                                        | 0.205 ± 0.030                            | 6.78   |
|                                                    | 6                                        | 0.229 ± 0.039                            | 5.85   |
|                                                    | 7                                        | 0.286 ± 0.055                            | 5.21   |
|                                                    | 8                                        | 0.302 ± 0.073                            | 4.14   |
|                                                    | 9                                        | 0.265 ± 0.156                            | 1.70   |
|                                                    | 10                                       | -0.009 ± 0.149                           | -0.06  |
|                                                    | <i>going</i> <sup>2</sup>                | -0.080 ± 0.007                           | -11.01 |
|                                                    | <i>going</i>                             | 0.232 ± 0.015                            | 15.96  |
|                                                    | <i>no_runners</i> <sup>2</sup>           | -0.002 ± 4x10 <sup>-4</sup>              | -5.39  |
|                                                    | <i>no_runners</i>                        | 0.018 ± 0.005                            | 4.05   |
|                                                    | <i>distance(yards)</i> <sup>2</sup>      | 1x10 <sup>-7</sup> ± 3x10 <sup>-8</sup>  | 5.51   |
|                                                    | <i>distance(yards)</i>                   | 9x10 <sup>-4</sup> ± 7x10 <sup>-6</sup>  | -13.23 |
|                                                    | <i>year.distance(yards)</i> <sup>2</sup> | 6x10 <sup>-9</sup> ± 3x10 <sup>-9</sup>  | 2.23   |
|                                                    | <i>year.distance(yards)</i>              | 3x10 <sup>-5</sup> ± 7x10 <sup>-6</sup>  | -3.70  |
|                                                    | <i>year</i>                              |                                          |        |
|                                                    | 1997                                     | 0 ± 0                                    |        |
|                                                    | 1998                                     | 0.017 ± 0.047                            | 0.35   |
|                                                    | 1999                                     | 0.114 ± 0.048                            | 2.35   |
|                                                    | 2000                                     | 0.006 ± 0.049                            | 0.11   |
|                                                    | 2001                                     | 0.022 ± 0.049                            | 0.44   |
|                                                    | 2002                                     | 0.154 ± 0.050                            | 3.06   |
|                                                    | 2003                                     | 0.145 ± 0.051                            | 2.86   |
|                                                    | 2004                                     | 0.124 ± 0.051                            | 2.41   |
|                                                    | 2005                                     | 0.257 ± 0.053                            | 4.86   |
|                                                    | 2006                                     | 0.270 ± 0.055                            | 4.95   |
|                                                    | 2007                                     | 0.284 ± 0.056                            | 5.08   |
|                                                    | 2008                                     | 0.256 ± 0.058                            | 4.41   |
|                                                    | 2009                                     | 0.300 ± 0.060                            | 5.03   |
|                                                    | 2010                                     | 0.373 ± 0.062                            | 6.01   |
|                                                    | 2011                                     | 0.337 ± 0.064                            | 5.23   |
|                                                    | 2012                                     | 0.381 ± 0.067                            | 5.68   |
|                                                    | $\mu$                                    | 18.36 ± 0.051                            | 362.42 |
| 2.3) Times of all runners in elite races 1997-2012 | <i>distance(yards).no_runners</i>        | -1x10 <sup>-6</sup> ± 1x10 <sup>-6</sup> | -1.03  |
|                                                    | <i>distance(yards).going</i>             | 6x10 <sup>-5</sup> ± 5x10 <sup>-6</sup>  | 11.55  |
|                                                    | <i>course</i>                            |                                          |        |
|                                                    | 10                                       | 0 ± 0                                    |        |
|                                                    | 11                                       | -0.181 ± 0.012                           | -14.98 |
|                                                    | 12                                       | -0.011 ± 0.012                           | -0.94  |
|                                                    | 13                                       | -0.022 ± 0.015                           | -1.45  |
|                                                    | 16                                       | -0.507 ± 0.010                           | -50.08 |
|                                                    | 23                                       | -0.561 ± 0.015                           | -36.90 |
|                                                    | 29                                       | -0.204 ± 0.013                           | -15.37 |
|                                                    | 33                                       | 0.030 ± 0.014                            | 2.15   |
|                                                    | 2                                        | -0.211 ± 0.012                           | -10.68 |
|                                                    | 6                                        | -0.180 ± 0.033                           | -5.48  |
|                                                    | 9                                        | -0.229 ± 0.036                           | -6.37  |
|                                                    | 24                                       | -0.069 ± 0.044                           | -1.57  |
|                                                    | 28                                       | -0.342 ± 0.025                           | -13.45 |

|  |                                         |                                          |        |
|--|-----------------------------------------|------------------------------------------|--------|
|  | 32                                      | -0.308 ± 0.017                           | -17.71 |
|  | 21                                      | 0.381 ± 0.106                            | 3.58   |
|  | 15                                      | 0.010 ± 0.064                            | 1.55   |
|  | 35                                      | -0.355 ± 0.042                           | -8.47  |
|  | 27                                      | -0.305 ± 0.096                           | -3.16  |
|  | 1                                       | -0.558 ± 0.042                           | -13.42 |
|  | <i>timing_method</i>                    |                                          |        |
|  | Automated                               | 0 ± 0                                    |        |
|  | Hand                                    | -0.077 ± 0.061                           | -1.27  |
|  | <i>sex</i>                              |                                          |        |
|  | Male                                    | 0 ± 0                                    |        |
|  | Female                                  | -0.069 ± 0.008                           | -8.75  |
|  | <i>age (years)</i>                      |                                          |        |
|  | 2                                       | 0 ± 0                                    |        |
|  | 3                                       | 0.172 ± 0.010                            | 17.23  |
|  | 4                                       | 0.251 ± 0.011                            | 23.08  |
|  | 5                                       | 0.242 ± 0.013                            | 19.17  |
|  | 6                                       | 0.203 ± 0.015                            | 13.12  |
|  | 7                                       | 0.201 ± 0.020                            | 9.95   |
|  | 8                                       | 0.154 ± 0.027                            | 5.73   |
|  | 9                                       | 0.151 ± 0.040                            | 3.74   |
|  | 11                                      | 0.251 ± 0.114                            | 2.19   |
|  | 12                                      | 0.446 ± 0.297                            | 1.50   |
|  | 10                                      | 0.176 ± 0.060                            | 2.91   |
|  | 13                                      | 0.592 ± 0.421                            | 1.41   |
|  | <i>going<sup>2</sup></i>                | -0.088 ± 0.003                           | -29.99 |
|  | <i>going</i>                            | 0.239 ± 0.005                            | 44.04  |
|  | <i>no_runners<sup>2</sup></i>           | -0.001 ± 1x10 <sup>-4</sup>              | -8.20  |
|  | <i>no_runners</i>                       | -0.002 ± 0.002                           | -0.99  |
|  | <i>distance(yards)<sup>2</sup></i>      | 1x10 <sup>-7</sup> ± 1x10 <sup>-8</sup>  | 11.62  |
|  | <i>distance(yards)</i>                  | -8x10 <sup>-4</sup> ± 3x10 <sup>-5</sup> | -29.64 |
|  | <i>year.distance(yards)<sup>2</sup></i> | -8x10 <sup>-9</sup> ± 1x10 <sup>-9</sup> | 7.36   |
|  | <i>year.distance(yards)</i>             | -3x10 <sup>-6</sup> ± 3x10 <sup>-7</sup> | -10.80 |
|  | <i>year</i>                             |                                          |        |
|  | 1997                                    | 0 ± 0                                    |        |
|  | 1998                                    | 0.030 ± 0.020                            | 1.48   |
|  | 1999                                    | 0.094 ± 0.020                            | 4.61   |
|  | 2000                                    | 0.019 ± 0.020                            | 0.92   |
|  | 2001                                    | 0.035 ± 0.021                            | 1.69   |
|  | 2002                                    | 0.174 ± 0.021                            | 8.25   |
|  | 2003                                    | 0.145 ± 0.021                            | 6.81   |
|  | 2004                                    | 0.137 ± 0.021                            | 6.43   |
|  | 2005                                    | 0.271 ± 0.022                            | 12.32  |
|  | 2006                                    | 0.269 ± 0.022                            | 11.94  |
|  | 2007                                    | 0.309 ± 0.023                            | 13.51  |
|  | 2008                                    | 0.314 ± 0.024                            | 13.31  |
|  | 2009                                    | 0.331 ± 0.024                            | 13.53  |
|  | 2010                                    | 0.404 ± 0.025                            | 15.96  |
|  | 2011                                    | 0.367 ± 0.026                            | 14.07  |
|  | 2012                                    | 0.431 ± 0.027                            | 15.88  |

|                                              |                                   |                                                   |        |
|----------------------------------------------|-----------------------------------|---------------------------------------------------|--------|
|                                              | $\mu$                             | 18.05 $\pm$ 0.021                                 | 867.37 |
| 2.4) Times of winners in all races 1997-2012 | <i>distance(yards).no_runners</i> | 1.88x10 <sup>-6</sup> $\pm$ 6.12x10 <sup>-7</sup> | 3.07   |
|                                              | <i>distance(yards).going</i>      | 5.72x10 <sup>-6</sup> $\pm$ 2.46x10 <sup>-6</sup> | 2.32   |
|                                              | <i>course</i>                     |                                                   |        |
|                                              | 1                                 | -7.998 $\pm$ 0.701                                | -11.41 |
|                                              | 2                                 | -7.738 $\pm$ 0.701                                | -11.04 |
|                                              | 3                                 | -8.098 $\pm$ 0.701                                | -11.55 |
|                                              | 4                                 | -7.825 $\pm$ 0.701                                | -11.16 |
|                                              | 5                                 | -7.809 $\pm$ 0.701                                | -11.14 |
|                                              | 6                                 | -7.304 $\pm$ 0.701                                | -10.42 |
|                                              | 7                                 | -7.840 $\pm$ 0.701                                | -11.18 |
|                                              | 8                                 | -7.467 $\pm$ 0.701                                | -10.65 |
|                                              | 9                                 | -7.803 $\pm$ 0.701                                | -11.13 |
|                                              | 10                                | -7.352 $\pm$ 0.701                                | -10.49 |
|                                              | 11                                | -7.658 $\pm$ 0.701                                | -10.92 |
|                                              | 12                                | -7.326 $\pm$ 0.701                                | -10.45 |
|                                              | 13                                | -7.576 $\pm$ 0.701                                | -10.81 |
|                                              | 14                                | -8.010 $\pm$ 0.701                                | -11.42 |
|                                              | 15                                | -7.619 $\pm$ 0.701                                | -10.86 |
|                                              | 16                                | -7.805 $\pm$ 0.701                                | -11.13 |
|                                              | 17                                | -7.656 $\pm$ 0.701                                | -10.92 |
|                                              | 18                                | -7.454 $\pm$ 0.701                                | -10.63 |
|                                              | 19                                | -7.671 $\pm$ 0.701                                | -10.94 |
|                                              | 20                                | -8.450 $\pm$ 0.701                                | -12.05 |
|                                              | 21                                | -7.534 $\pm$ 0.701                                | -10.75 |
|                                              | 22                                | -7.721 $\pm$ 0.701                                | -11.01 |
|                                              | 23                                | -7.963 $\pm$ 0.701                                | -11.36 |
|                                              | 24                                | -7.615 $\pm$ 0.701                                | -10.86 |
|                                              | 25                                | -7.962 $\pm$ 0.701                                | -11.36 |
|                                              | 26                                | -7.850 $\pm$ 0.701                                | -11.20 |
|                                              | 27                                | -7.180 $\pm$ 0.701                                | -10.24 |
|                                              | 28                                | -7.681 $\pm$ 0.701                                | -10.96 |
|                                              | 29                                | -7.576 $\pm$ 0.701                                | -10.81 |
|                                              | 30                                | -7.659 $\pm$ 0.701                                | -10.93 |
|                                              | 31                                | -7.201 $\pm$ 0.701                                | -10.27 |
|                                              | 32                                | -7.249 $\pm$ 0.701                                | -10.34 |
|                                              | 33                                | -7.426 $\pm$ 0.701                                | -10.59 |
|                                              | 34                                | -8.212 $\pm$ 0.702                                | -11.71 |
|                                              | 35                                | -7.915 $\pm$ 0.701                                | -11.29 |
|                                              | 36                                | -7.497 $\pm$ 0.702                                | -10.69 |
|                                              | <i>timing_method</i>              |                                                   |        |
|                                              | Automated                         | 0 $\pm$ 0                                         |        |
|                                              | Hand                              | 0.068 $\pm$ 0.007                                 | 9.80   |
|                                              | <i>sex</i>                        |                                                   |        |
|                                              | Male                              | 0 $\pm$ 0                                         |        |
|                                              | Female                            | -0.025 $\pm$ 0.004                                | -6.52  |
|                                              | <i>age (years)</i>                |                                                   |        |
|                                              | 2                                 | 0 $\pm$ 0                                         |        |
|                                              | 3                                 | 0.165 $\pm$ 0.005                                 | 34.47  |
|                                              | 4                                 | 0.231 $\pm$ 0.006                                 | 40.70  |

|                                                     |                                          |                                          |        |
|-----------------------------------------------------|------------------------------------------|------------------------------------------|--------|
|                                                     | 5                                        | 0.214 ± 0.007                            | 32.94  |
|                                                     | 6                                        | 0.211 ± 0.008                            | 27.13  |
|                                                     | 7                                        | 0.188 ± 0.010                            | 19.63  |
|                                                     | 8                                        | 0.176 ± 0.012                            | 14.18  |
|                                                     | 9                                        | 0.167 ± 0.017                            | 9.93   |
|                                                     | 10                                       | 0.113 ± 0.024                            | 4.68   |
|                                                     | 11                                       | 0.112 ± 0.036                            | 3.07   |
|                                                     | 12                                       | 0.191 ± 0.059                            | 3.25   |
|                                                     | 13                                       | 0.064 ± 0.132                            | 0.48   |
|                                                     | 14                                       | 0.037 ± 0.371                            | 0.10   |
|                                                     | <i>going</i> <sup>2</sup>                | -0.068 ± 0.001                           | -56.61 |
|                                                     | <i>going</i>                             | 0.286 ± 0.002                            | 116.64 |
|                                                     | <i>no_runners</i> <sup>2</sup>           | 2x10 <sup>-4</sup> ± 6x10 <sup>-5</sup>  | -3.06  |
|                                                     | <i>no_runners</i>                        | 0.006 ± 6x10 <sup>-4</sup>               | 9.09   |
|                                                     | <i>distance(yards)</i> <sup>2</sup>      | 2x10 <sup>-7</sup> ± 6x10 <sup>-9</sup>  | 38.69  |
|                                                     | <i>distance(yards)</i>                   | -0.001 ± 1x10 <sup>-5</sup>              | -85.39 |
|                                                     | <i>year.distance(yards)</i> <sup>2</sup> | 1x10 <sup>-9</sup> ± 7x10 <sup>-10</sup> | 2.05   |
|                                                     | <i>year.distance(yards)</i>              | 7x10 <sup>-6</sup> ± 2x10 <sup>-6</sup>  | -4.41  |
|                                                     | <i>year</i>                              |                                          |        |
|                                                     | 1997                                     | 0 ± 0                                    |        |
|                                                     | 1998                                     | 0.005 ± 0.010                            | 0.51   |
|                                                     | 1999                                     | 0.093 ± 0.010                            | 9.51   |
|                                                     | 2000                                     | 0.070 ± 0.010                            | 6.99   |
|                                                     | 2001                                     | 0.037 ± 0.010                            | 3.72   |
|                                                     | 2002                                     | 0.073 ± 0.010                            | 7.07   |
|                                                     | 2003                                     | 0.121 ± 0.011                            | 10.85  |
|                                                     | 2004                                     | 0.078 ± 0.011                            | 6.93   |
|                                                     | 2005                                     | 0.137 ± 0.012                            | 11.84  |
|                                                     | 2006                                     | 0.185 ± 0.012                            | 15.37  |
|                                                     | 2007                                     | 0.167 ± 0.012                            | 13.55  |
|                                                     | 2008                                     | 0.145 ± 0.013                            | 11.52  |
|                                                     | 2009                                     | 0.202 ± 0.013                            | 15.82  |
|                                                     | 2010                                     | 0.194 ± 0.013                            | 14.75  |
|                                                     | 2011                                     | 0.204 ± 0.014                            | 15.02  |
|                                                     | 2012                                     | 0.188 ± 0.014                            | 13.31  |
|                                                     | $\mu$                                    | 25.63 ± 0.701                            | 36.56  |
| 2.5) Times of all runners<br>in all races 1997-2012 | <i>distance(yards).no_runners</i>        | 3x10 <sup>-6</sup> ± 2x10 <sup>-7</sup>  | 12.62  |
|                                                     | <i>distance(yards).going</i>             | 1x10 <sup>-5</sup> ± 9x10 <sup>-7</sup>  | 15.19  |
|                                                     | <i>course</i>                            |                                          |        |
|                                                     | 1                                        | 0 ± 0                                    |        |
|                                                     | 2                                        | 0.233 ± 0.005                            | 47.17  |
|                                                     | 3                                        | -0.086 ± 0.005                           | -17.03 |
|                                                     | 4                                        | 0.196 ± 0.006                            | 34.09  |
|                                                     | 5                                        | 0.229 ± 0.005                            | 41.74  |
|                                                     | 6                                        | 0.738 ± 0.005                            | 141.24 |
|                                                     | 7                                        | 0.198 ± 0.005                            | 37.19  |
|                                                     | 8                                        | 0.572 ± 0.005                            | 111.98 |
|                                                     | 9                                        | 0.231 ± 0.005                            | 43.19  |
|                                                     | 10                                       | 0.575 ± 0.005                            | 118.42 |
|                                                     | 11                                       | 0.348 ± 0.005                            | 73.22  |

|  |                               |                                         |         |
|--|-------------------------------|-----------------------------------------|---------|
|  | 12                            | 0.556 ± 0.005                           | 111.13  |
|  | 13                            | 0.324 ± 0.005                           | 67.77   |
|  | 14                            | 0.028 ± 0.006                           | 4.46    |
|  | 15                            | 0.362 ± 0.006                           | 58.51   |
|  | 16                            | 0.064 ± 0.005                           | 12.39   |
|  | 17                            | 0.308 ± 0.005                           | 56.71   |
|  | 18                            | 0.578 ± 0.005                           | 105.84  |
|  | 19                            | 0.324 ± 0.005                           | 60.62   |
|  | 20                            | -0.508 ± 0.005                          | -97.67  |
|  | 21                            | 0.463 ± 0.005                           | 92.82   |
|  | 22                            | 0.326 ± 0.006                           | 58.94   |
|  | 23                            | 0.043 ± 0.005                           | 8.32    |
|  | 24                            | 0.373 ± 0.005                           | 78.85   |
|  | 25                            | 0.063 ± 0.005                           | 12.31   |
|  | 26                            | 0.153 ± 0.005                           | 31.43   |
|  | 27                            | 0.857 ± 0.006                           | 151.43  |
|  | 28                            | 0.272 ± 0.006                           | 46.96   |
|  | 29                            | 0.357 ± 0.005                           | 74.13   |
|  | 30                            | 0.367 ± 0.005                           | 72.58   |
|  | 31                            | 0.842 ± 0.005                           | 164.45  |
|  | 32                            | 0.728 ± 0.006                           | 121.89  |
|  | 33                            | 0.546 ± 0.005                           | 112.42  |
|  | 34                            | -0.163 ± 0.012                          | -13.70  |
|  | 35                            | 0.080 ± 0.006                           | 14.56   |
|  | 36                            | 0.517 ± 0.013                           | 38.68   |
|  | <i>timing_method</i>          |                                         |         |
|  | Automated                     | 0 ± 0                                   |         |
|  | Hand                          | 0.071 ± 0.003                           | 26.18   |
|  | <i>sex</i>                    |                                         |         |
|  | Male                          | 0 ± 0                                   |         |
|  | Female                        | -0.062 ± 0.003                          | -23.79  |
|  | <i>age (years)</i>            |                                         |         |
|  | 2                             | 0 ± 0                                   |         |
|  | 3                             | 0.138 ± 0.002                           | 69.28   |
|  | 4                             | 0.166 ± 0.002                           | 68.36   |
|  | 5                             | 0.168 ± 0.003                           | 58.75   |
|  | 6                             | 0.146 ± 0.003                           | 43.72   |
|  | 7                             | 0.105 ± 0.004                           | 26.76   |
|  | 8                             | 0.060 ± 0.005                           | 12.56   |
|  | 9                             | 0.027 ± 0.006                           | 4.37    |
|  | 10                            | -0.009 ± 0.008                          | -1.08   |
|  | 11                            | -0.058 ± 0.012                          | -4.69   |
|  | 12                            | -0.079 ± 0.020                          | -3.89   |
|  | 13                            | -0.238 ± 0.033                          | -7.31   |
|  | 14                            | -0.273 ± 0.066                          | -4.11   |
|  | 15                            | -1.199 ± 0.332                          | -3.62   |
|  | <i>going<sup>2</sup></i>      | -0.077 ± 5x10 <sup>-4</sup>             | -170.38 |
|  | <i>going</i>                  | 0.312 ± 9x10 <sup>-4</sup>              | 338.25  |
|  | <i>no_runners<sup>2</sup></i> | 1x10 <sup>-4</sup> ± 2x10 <sup>-5</sup> | 7.70    |
|  | <i>no_runners</i>             | -0.005 ± 2x10 <sup>-4</sup>             | -24.78  |



|  |                          |                                           |         |
|--|--------------------------|-------------------------------------------|---------|
|  | $distance(yards)^2$      | $2 \times 10^{-7} \pm 3 \times 10^{-9}$   | 84.71   |
|  | $distance(yards)$        | $-0.001 \pm 7 \times 10^{-6}$             | -170.68 |
|  | $year.distance(yards)^2$ | $9 \times 10^{-10} \pm 3 \times 10^{-10}$ | 2.82    |
|  | $year.distance(yards)$   | $7 \times 10^{-6} \pm 8 \times 10^{-7}$   | -8.70   |
|  | <i>year</i>              |                                           |         |
|  | 1997                     | $0 \pm 0$                                 |         |
|  | 1998                     | $0.014 \pm 0.004$                         | 3.43    |
|  | 1999                     | $0.100 \pm 0.004$                         | 23.95   |
|  | 2000                     | $0.091 \pm 0.004$                         | 20.68   |
|  | 2001                     | $0.031 \pm 0.004$                         | 6.90    |
|  | 2002                     | $0.083 \pm 0.005$                         | 17.84   |
|  | 2003                     | $0.128 \pm 0.005$                         | 25.39   |
|  | 2004                     | $0.108 \pm 0.005$                         | 21.01   |
|  | 2005                     | $0.159 \pm 0.005$                         | 29.92   |
|  | 2006                     | $0.204 \pm 0.006$                         | 36.59   |
|  | 2007                     | $0.204 \pm 0.006$                         | 35.54   |
|  | 2008                     | $0.189 \pm 0.006$                         | 31.92   |
|  | 2009                     | $0.242 \pm 0.006$                         | 39.42   |
|  | 2010                     | $0.243 \pm 0.006$                         | 38.00   |
|  | 2011                     | $0.263 \pm 0.007$                         | 39.19   |
|  | 2012                     | $0.253 \pm 0.007$                         | 35.70   |
|  | $\mu$                    | $17.21 \pm 0.006$                         | 2917.94 |
