# Supplementary material
Source: PubMed Central journal article supplement (PMC4528479)
Supplement: rsbl20150310supp3.pdf [file rsbl20150310supp3.pdf]

Supplementary Table 2: Predicted average horse speed by year at 6, 10 and 17 furlongs in each subset. Predictions are made based on parameter estimates from Model 2 with year fitted as a multilevel factor.

| <b>Dataset</b>                              | <b>Year</b> | <b>Distance<br/>(furlongs)</b> | <b>Prediction (3d.p)<br/>± SE (3d.p)</b> |                |
|---------------------------------------------|-------------|--------------------------------|------------------------------------------|----------------|
| 2.1) Winning times of elite races 1850-2012 | 1850        | 6                              | 16.295 ± 0.106                           |                |
|                                             | 1851        | 6                              | 15.950 ± 0.109                           |                |
|                                             | 1853        | 6                              | 15.939 ± 0.109                           |                |
|                                             |             | 1855                           | 6                                        | 16.055 ± 0.105 |
|                                             |             | 1860                           | 6                                        | 16.039 ± 0.109 |
|                                             |             | 1861                           | 6                                        | 16.365 ± 0.104 |
|                                             |             | 1876                           | 6                                        | 15.943 ± 0.138 |
|                                             |             | 1880                           | 6                                        | 16.485 ± 0.133 |
|                                             |             | 1885                           | 6                                        | 16.196 ± 0.111 |
|                                             |             | 1895                           | 6                                        | 16.822 ± 0.121 |
|                                             |             | 1900                           | 6                                        | 17.140 ± 0.105 |
|                                             |             | 1903                           | 6                                        | 16.904 ± 0.091 |
|                                             |             | 1910                           | 6                                        | 17.328 ± 0.091 |
|                                             |             | 1919                           | 6                                        | 17.429 ± 0.083 |
|                                             |             | 1920                           | 6                                        | 17.247 ± 0.116 |
|                                             |             | 1930                           | 6                                        | 17.443 ± 0.073 |
|                                             |             | 1933                           | 6                                        | 17.628 ± 0.074 |
|                                             |             | 1935                           | 6                                        | 17.539 ± 0.072 |
|                                             |             | 1938                           | 6                                        | 17.672 ± 0.074 |
|                                             |             | 1940                           | 6                                        | 17.305 ± 0.137 |
|                                             |             | 1946                           | 6                                        | 17.309 ± 0.073 |
|                                             |             | 1947                           | 6                                        | 17.630 ± 0.071 |
|                                             |             | 1948                           | 6                                        | 17.596 ± 0.070 |
|                                             |             | 1949                           | 6                                        | 17.663 ± 0.070 |
|                                             |             | 1950                           | 6                                        | 17.447 ± 0.069 |
|                                             |             | 1951                           | 6                                        | 17.551 ± 0.069 |
|                                             |             | 1952                           | 6                                        | 17.422 ± 0.071 |
|                                             |             | 1953                           | 6                                        | 17.666 ± 0.070 |
|                                             |             | 1954                           | 6                                        | 17.424 ± 0.067 |
|                                             |             | 1955                           | 6                                        | 17.520 ± 0.071 |
|                                             |             | 1956                           | 6                                        | 17.582 ± 0.067 |
|                                             |             | 1959                           | 6                                        | 17.589 ± 0.071 |
|                                             |             | 1960                           | 6                                        | 17.755 ± 0.068 |
|                                             | 1962        | 6                              | 17.701 ± 0.066                           |                |
|                                             | 1963        | 6                              | 17.651 ± 0.067                           |                |
|                                             | 1964        | 6                              | 17.710 ± 0.073                           |                |
|                                             | 1966        | 6                              | 17.738 ± 0.066                           |                |
|                                             | 1967        | 6                              | 17.689 ± 0.065                           |                |
|                                             | 1969        | 6                              | 17.545 ± 0.065                           |                |
|                                             | 1970        | 6                              | 17.774 ± 0.066                           |                |
|                                             | 1971        | 6                              | 17.832 ± 0.066                           |                |
|                                             | 1975        | 6                              | 17.836 ± 0.064                           |                |

|  |      |    |                |
|--|------|----|----------------|
|  | 1980 | 6  | 17.966 ± 0.064 |
|  | 1985 | 6  | 18.059 ± 0.064 |
|  | 1990 | 6  | 18.253 ± 0.063 |
|  | 1994 | 6  | 18.227 ± 0.061 |
|  | 1996 | 6  | 18.290 ± 0.055 |
|  | 1997 | 6  | 18.242 ± 0.055 |
|  | 1998 | 6  | 18.237 ± 0.055 |
|  | 1999 | 6  | 18.322 ± 0.056 |
|  | 2000 | 6  | 18.200 ± 0.055 |
|  | 2001 | 6  | 18.194 ± 0.054 |
|  | 2002 | 6  | 18.305 ± 0.053 |
|  | 2003 | 6  | 18.282 ± 0.051 |
|  | 2004 | 6  | 18.261 ± 0.051 |
|  | 2005 | 6  | 18.367 ± 0.050 |
|  | 2006 | 6  | 18.376 ± 0.049 |
|  | 2007 | 6  | 18.381 ± 0.051 |
|  | 2008 | 6  | 18.346 ± 0.051 |
|  | 2009 | 6  | 18.372 ± 0.050 |
|  | 2010 | 6  | 18.427 ± 0.050 |
|  | 2011 | 6  | 18.376 ± 0.050 |
|  | 2012 | 6  | 18.408 ± 0.051 |
|  | 1850 | 10 | 15.920 ± 0.105 |
|  | 1851 | 10 | 15.573 ± 0.107 |
|  | 1853 | 10 | 15.557 ± 0.107 |
|  | 1855 | 10 | 15.668 ± 0.103 |
|  | 1860 | 10 | 15.639 ± 0.109 |
|  | 1861 | 10 | 15.962 ± 0.102 |
|  | 1876 | 10 | 15.500 ± 0.139 |
|  | 1880 | 10 | 16.031 ± 0.130 |
|  | 1885 | 10 | 15.729 ± 0.110 |
|  | 1895 | 10 | 16.328 ± 0.119 |
|  | 1900 | 10 | 16.633 ± 0.104 |
|  | 1903 | 10 | 16.390 ± 0.090 |
|  | 1910 | 10 | 16.795 ± 0.090 |
|  | 1919 | 10 | 16.872 ± 0.082 |
|  | 1920 | 10 | 16.687 ± 0.116 |
|  | 1930 | 10 | 16.857 ± 0.073 |
|  | 1933 | 10 | 17.034 ± 0.074 |
|  | 1935 | 10 | 16.940 ± 0.072 |
|  | 1938 | 10 | 17.065 ± 0.074 |
|  | 1940 | 10 | 16.693 ± 0.136 |
|  | 1946 | 10 | 16.681 ± 0.073 |
|  | 1947 | 10 | 16.999 ± 0.071 |
|  | 1948 | 10 | 16.963 ± 0.070 |
|  | 1949 | 10 | 17.027 ± 0.070 |
|  | 1950 | 10 | 16.808 ± 0.069 |
|  | 1951 | 10 | 16.910 ± 0.069 |
|  | 1952 | 10 | 16.778 ± 0.071 |
|  | 1953 | 10 | 17.020 ± 0.070 |
|  | 1954 | 10 | 16.775 ± 0.067 |

|  |      |    |                |
|--|------|----|----------------|
|  | 1955 | 10 | 16.868 ± 0.070 |
|  | 1956 | 10 | 16.927 ± 0.067 |
|  | 1959 | 10 | 16.926 ± 0.071 |
|  | 1960 | 10 | 17.090 ± 0.067 |
|  | 1962 | 10 | 17.030 ± 0.066 |
|  | 1963 | 10 | 16.978 ± 0.067 |
|  | 1964 | 10 | 17.035 ± 0.073 |
|  | 1966 | 10 | 17.057 ± 0.066 |
|  | 1967 | 10 | 17.006 ± 0.065 |
|  | 1969 | 10 | 16.856 ± 0.065 |
|  | 1970 | 10 | 17.083 ± 0.066 |
|  | 1971 | 10 | 17.138 ± 0.066 |
|  | 1975 | 10 | 17.131 ± 0.064 |
|  | 1980 | 10 | 17.248 ± 0.064 |
|  | 1985 | 10 | 17.328 ± 0.064 |
|  | 1990 | 10 | 17.509 ± 0.063 |
|  | 1994 | 10 | 17.473 ± 0.061 |
|  | 1996 | 10 | 17.530 ± 0.055 |
|  | 1997 | 10 | 17.479 ± 0.055 |
|  | 1998 | 10 | 17.471 ± 0.055 |
|  | 1999 | 10 | 17.554 ± 0.055 |
|  | 2000 | 10 | 17.430 ± 0.054 |
|  | 2001 | 10 | 17.421 ± 0.053 |
|  | 2002 | 10 | 17.529 ± 0.052 |
|  | 2003 | 10 | 17.504 ± 0.051 |
|  | 2004 | 10 | 17.480 ± 0.050 |
|  | 2005 | 10 | 17.583 ± 0.049 |
|  | 2006 | 10 | 17.590 ± 0.048 |
|  | 2007 | 10 | 17.591 ± 0.050 |
|  | 2008 | 10 | 17.554 ± 0.050 |
|  | 2009 | 10 | 17.578 ± 0.049 |
|  | 2010 | 10 | 17.630 ± 0.050 |
|  | 2011 | 10 | 17.576 ± 0.049 |
|  | 2012 | 10 | 17.605 ± 0.050 |
|  | 1850 | 17 | 15.415 ± 0.109 |
|  | 1851 | 17 | 15.066 ± 0.111 |
|  | 1853 | 17 | 15.048 ± 0.110 |
|  | 1855 | 17 | 15.157 ± 0.106 |
|  | 1860 | 17 | 15.122 ± 0.110 |
|  | 1861 | 17 | 15.443 ± 0.105 |
|  | 1876 | 17 | 14.964 ± 0.139 |
|  | 1880 | 17 | 15.491 ± 0.131 |
|  | 1885 | 17 | 15.183 ± 0.113 |
|  | 1895 | 17 | 15.770 ± 0.121 |
|  | 1900 | 17 | 16.069 ± 0.106 |
|  | 1903 | 17 | 15.822 ± 0.092 |
|  | 1910 | 17 | 16.218 ± 0.092 |
|  | 1919 | 17 | 16.285 ± 0.083 |
|  | 1920 | 17 | 16.099 ± 0.117 |
|  | 1930 | 17 | 16.258 ± 0.074 |

|                                             |      |    |                |
|---------------------------------------------|------|----|----------------|
|                                             | 1933 | 17 | 16.431 ± 0.075 |
|                                             | 1935 | 17 | 16.334 ± 0.073 |
|                                             | 1938 | 17 | 16.456 ± 0.075 |
|                                             | 1940 | 17 | 16.081 ± 0.136 |
|                                             | 1946 | 17 | 16.062 ± 0.073 |
|                                             | 1947 | 17 | 16.379 ± 0.072 |
|                                             | 1948 | 17 | 16.342 ± 0.071 |
|                                             | 1949 | 17 | 16.404 ± 0.070 |
|                                             | 1950 | 17 | 16.185 ± 0.069 |
|                                             | 1951 | 17 | 16.285 ± 0.069 |
|                                             | 1952 | 17 | 16.152 ± 0.071 |
|                                             | 1953 | 17 | 16.392 ± 0.070 |
|                                             | 1954 | 17 | 16.146 ± 0.067 |
|                                             | 1955 | 17 | 16.239 ± 0.071 |
|                                             | 1956 | 17 | 16.296 ± 0.067 |
|                                             | 1959 | 17 | 16.292 ± 0.071 |
|                                             | 1960 | 17 | 16.455 ± 0.068 |
|                                             | 1962 | 17 | 16.392 ± 0.066 |
|                                             | 1963 | 17 | 16.339 ± 0.067 |
|                                             | 1964 | 17 | 16.394 ± 0.073 |
|                                             | 1966 | 17 | 16.414 ± 0.066 |
|                                             | 1967 | 17 | 16.362 ± 0.065 |
|                                             | 1969 | 17 | 16.210 ± 0.065 |
|                                             | 1970 | 17 | 16.435 ± 0.066 |
|                                             | 1971 | 17 | 16.489 ± 0.066 |
|                                             | 1975 | 17 | 16.478 ± 0.064 |
|                                             | 1980 | 17 | 16.589 ± 0.064 |
|                                             | 1985 | 17 | 16.663 ± 0.064 |
|                                             | 1990 | 17 | 16.838 ± 0.063 |
|                                             | 1994 | 17 | 16.797 ± 0.062 |
|                                             | 1996 | 17 | 16.852 ± 0.056 |
|                                             | 1997 | 17 | 16.800 ± 0.056 |
|                                             | 1998 | 17 | 16.791 ± 0.056 |
|                                             | 1999 | 17 | 16.873 ± 0.057 |
|                                             | 2000 | 17 | 16.747 ± 0.056 |
|                                             | 2001 | 17 | 16.736 ± 0.055 |
|                                             | 2002 | 17 | 16.844 ± 0.054 |
|                                             | 2003 | 17 | 16.817 ± 0.053 |
|                                             | 2004 | 17 | 16.792 ± 0.053 |
|                                             | 2005 | 17 | 16.894 ± 0.052 |
|                                             | 2006 | 17 | 16.900 ± 0.051 |
|                                             | 2007 | 17 | 16.900 ± 0.053 |
|                                             | 2008 | 17 | 16.862 ± 0.053 |
|                                             | 2009 | 17 | 16.884 ± 0.053 |
|                                             | 2010 | 17 | 16.935 ± 0.053 |
|                                             | 2011 | 17 | 16.880 ± 0.052 |
|                                             | 2012 | 17 | 16.908 ± 0.054 |
| 2.2) Winning times of elite races 1997-2012 | 1997 | 6  | 18.102 ± 0.080 |
|                                             | 1998 | 6  | 18.114 ± 0.080 |
|                                             | 1999 | 6  | 18.205 ± 0.079 |

|                                                    |      |    |                |
|----------------------------------------------------|------|----|----------------|
|                                                    | 2000 | 6  | 18.091 ± 0.079 |
|                                                    | 2001 | 6  | 18.102 ± 0.077 |
|                                                    | 2002 | 6  | 18.228 ± 0.076 |
|                                                    | 2003 | 6  | 18.214 ± 0.079 |
|                                                    | 2004 | 6  | 18.187 ± 0.077 |
|                                                    | 2005 | 6  | 18.315 ± 0.077 |
|                                                    | 2006 | 6  | 18.322 ± 0.077 |
|                                                    | 2007 | 6  | 18.331 ± 0.077 |
|                                                    | 2008 | 6  | 18.297 ± 0.077 |
|                                                    | 2009 | 6  | 18.335 ± 0.077 |
|                                                    | 2010 | 6  | 18.403 ± 0.077 |
|                                                    | 2011 | 6  | 18.361 ± 0.077 |
|                                                    | 2012 | 6  | 18.400 ± 0.078 |
|                                                    | 1997 | 10 | 17.448 ± 0.079 |
|                                                    | 1998 | 10 | 17.443 ± 0.079 |
|                                                    | 1999 | 10 | 17.518 ± 0.078 |
|                                                    | 2000 | 10 | 17.388 ± 0.078 |
|                                                    | 2001 | 10 | 17.382 ± 0.077 |
|                                                    | 2002 | 10 | 17.492 ± 0.076 |
|                                                    | 2003 | 10 | 17.461 ± 0.078 |
|                                                    | 2004 | 10 | 17.418 ± 0.076 |
|                                                    | 2005 | 10 | 17.530 ± 0.077 |
|                                                    | 2006 | 10 | 17.521 ± 0.077 |
|                                                    | 2007 | 10 | 17.513 ± 0.077 |
|                                                    | 2008 | 10 | 17.463 ± 0.077 |
|                                                    | 2009 | 10 | 17.485 ± 0.077 |
|                                                    | 2010 | 10 | 17.536 ± 0.077 |
|                                                    | 2011 | 10 | 17.478 ± 0.077 |
|                                                    | 2012 | 10 | 17.501 ± 0.078 |
|                                                    | 1997 | 17 | 16.850 ± 0.095 |
|                                                    | 1998 | 17 | 16.840 ± 0.092 |
|                                                    | 1999 | 17 | 16.910 ± 0.089 |
|                                                    | 2000 | 17 | 16.775 ± 0.087 |
|                                                    | 2001 | 17 | 16.764 ± 0.084 |
|                                                    | 2002 | 17 | 16.869 ± 0.081 |
|                                                    | 2003 | 17 | 16.833 ± 0.082 |
|                                                    | 2004 | 17 | 16.785 ± 0.079 |
|                                                    | 2005 | 17 | 16.891 ± 0.079 |
|                                                    | 2006 | 17 | 16.877 ± 0.078 |
|                                                    | 2007 | 17 | 16.864 ± 0.079 |
|                                                    | 2008 | 17 | 16.810 ± 0.080 |
|                                                    | 2009 | 17 | 16.826 ± 0.080 |
|                                                    | 2010 | 17 | 16.873 ± 0.081 |
|                                                    | 2011 | 17 | 16.810 ± 0.083 |
|                                                    | 2012 | 17 | 16.827 ± 0.085 |
| 2.3) Times of all runners in elite races 1997-2012 | 1997 | 6  | 17.838 ± 0.05  |
|                                                    | 1998 | 6  | 17.861 ± 0.049 |
|                                                    | 1999 | 6  | 17.919 ± 0.049 |
|                                                    | 2000 | 6  | 17.837 ± 0.049 |
|                                                    | 2001 | 6  | 17.847 ± 0.049 |

|                                              |      |    |                |
|----------------------------------------------|------|----|----------------|
|                                              | 2002 | 6  | 17.980 ± 0.049 |
|                                              | 2003 | 6  | 17.943 ± 0.049 |
|                                              | 2004 | 6  | 17.929 ± 0.049 |
|                                              | 2005 | 6  | 18.056 ± 0.049 |
|                                              | 2006 | 6  | 18.048 ± 0.049 |
|                                              | 2007 | 6  | 18.081 ± 0.048 |
|                                              | 2008 | 6  | 18.080 ± 0.049 |
|                                              | 2009 | 6  | 18.090 ± 0.048 |
|                                              | 2010 | 6  | 18.157 ± 0.048 |
|                                              | 2011 | 6  | 18.112 ± 0.049 |
|                                              | 2012 | 6  | 18.170 ± 0.049 |
|                                              | 1997 | 10 | 17.234 ± 0.049 |
|                                              | 1998 | 10 | 17.239 ± 0.049 |
|                                              | 1999 | 10 | 17.279 ± 0.049 |
|                                              | 2000 | 10 | 17.178 ± 0.049 |
|                                              | 2001 | 10 | 17.169 ± 0.049 |
|                                              | 2002 | 10 | 17.284 ± 0.049 |
|                                              | 2003 | 10 | 17.229 ± 0.049 |
|                                              | 2004 | 10 | 17.197 ± 0.048 |
|                                              | 2005 | 10 | 17.306 ± 0.048 |
|                                              | 2006 | 10 | 17.279 ± 0.048 |
|                                              | 2007 | 10 | 17.294 ± 0.048 |
|                                              | 2008 | 10 | 17.274 ± 0.048 |
|                                              | 2009 | 10 | 17.266 ± 0.048 |
|                                              | 2010 | 10 | 17.315 ± 0.048 |
|                                              | 2011 | 10 | 17.252 ± 0.048 |
|                                              | 2012 | 10 | 17.291 ± 0.049 |
|                                              | 1997 | 17 | 16.635 ± 0.052 |
|                                              | 1998 | 17 | 16.639 ± 0.051 |
|                                              | 1999 | 17 | 16.677 ± 0.051 |
|                                              | 2000 | 17 | 16.576 ± 0.050 |
|                                              | 2001 | 17 | 16.565 ± 0.050 |
|                                              | 2002 | 17 | 16.679 ± 0.050 |
|                                              | 2003 | 17 | 16.623 ± 0.049 |
|                                              | 2004 | 17 | 16.590 ± 0.049 |
|                                              | 2005 | 17 | 16.697 ± 0.049 |
|                                              | 2006 | 17 | 16.669 ± 0.049 |
|                                              | 2007 | 17 | 16.683 ± 0.049 |
|                                              | 2008 | 17 | 16.662 ± 0.049 |
|                                              | 2009 | 17 | 16.653 ± 0.049 |
|                                              | 2010 | 17 | 16.700 ± 0.049 |
|                                              | 2011 | 17 | 16.636 ± 0.050 |
|                                              | 2012 | 17 | 16.675 ± 0.050 |
| 2.4) Times of winners in all races 1997-2012 | 1997 | 6  | 17.845 ± 0.032 |
|                                              | 1998 | 6  | 17.849 ± 0.032 |
|                                              | 1999 | 6  | 17.935 ± 0.032 |
|                                              | 2000 | 6  | 17.911 ± 0.032 |
|                                              | 2001 | 6  | 17.877 ± 0.032 |
|                                              | 2002 | 6  | 17.910 ± 0.032 |
|                                              | 2003 | 6  | 17.957 ± 0.032 |

|                                                  |      |    |                |
|--------------------------------------------------|------|----|----------------|
|                                                  | 2004 | 6  | 17.913 ± 0.032 |
|                                                  | 2005 | 6  | 17.970 ± 0.032 |
|                                                  | 2006 | 6  | 18.017 ± 0.032 |
|                                                  | 2007 | 6  | 17.997 ± 0.032 |
|                                                  | 2008 | 6  | 17.973 ± 0.032 |
|                                                  | 2009 | 6  | 18.029 ± 0.032 |
|                                                  | 2010 | 6  | 18.020 ± 0.032 |
|                                                  | 2011 | 6  | 18.028 ± 0.032 |
|                                                  | 2012 | 6  | 18.010 ± 0.032 |
|                                                  | 1997 | 10 | 16.993 ± 0.032 |
|                                                  | 1998 | 10 | 16.992 ± 0.032 |
|                                                  | 1999 | 10 | 17.074 ± 0.032 |
|                                                  | 2000 | 10 | 17.045 ± 0.032 |
|                                                  | 2001 | 10 | 17.006 ± 0.032 |
|                                                  | 2002 | 10 | 17.035 ± 0.032 |
|                                                  | 2003 | 10 | 17.077 ± 0.032 |
|                                                  | 2004 | 10 | 17.028 ± 0.032 |
|                                                  | 2005 | 10 | 17.081 ± 0.032 |
|                                                  | 2006 | 10 | 17.123 ± 0.032 |
|                                                  | 2007 | 10 | 17.098 ± 0.032 |
|                                                  | 2008 | 10 | 17.070 ± 0.032 |
|                                                  | 2009 | 10 | 17.122 ± 0.032 |
|                                                  | 2010 | 10 | 17.107 ± 0.032 |
|                                                  | 2011 | 10 | 17.111 ± 0.032 |
|                                                  | 2012 | 10 | 17.088 ± 0.032 |
|                                                  | 1997 | 17 | 16.432 ± 0.034 |
|                                                  | 1998 | 17 | 16.429 ± 0.033 |
|                                                  | 1999 | 17 | 16.508 ± 0.033 |
|                                                  | 2000 | 17 | 16.476 ± 0.033 |
|                                                  | 2001 | 17 | 16.434 ± 0.033 |
|                                                  | 2002 | 17 | 16.461 ± 0.032 |
|                                                  | 2003 | 17 | 16.500 ± 0.032 |
|                                                  | 2004 | 17 | 16.449 ± 0.032 |
|                                                  | 2005 | 17 | 16.499 ± 0.032 |
|                                                  | 2006 | 17 | 16.538 ± 0.032 |
|                                                  | 2007 | 17 | 16.510 ± 0.032 |
|                                                  | 2008 | 17 | 16.480 ± 0.032 |
|                                                  | 2009 | 17 | 16.528 ± 0.033 |
|                                                  | 2010 | 17 | 16.511 ± 0.033 |
|                                                  | 2011 | 17 | 16.512 ± 0.033 |
|                                                  | 2012 | 17 | 16.487 ± 0.033 |
| 2.5) Times of all runners in all races 1997-2012 | 1997 | 6  | 17.200 ± 0.025 |
|                                                  | 1998 | 6  | 17.213 ± 0.025 |
|                                                  | 1999 | 6  | 17.298 ± 0.025 |
|                                                  | 2000 | 6  | 17.287 ± 0.025 |
|                                                  | 2001 | 6  | 17.226 ± 0.025 |
|                                                  | 2002 | 6  | 17.277 ± 0.025 |
|                                                  | 2003 | 6  | 17.320 ± 0.025 |
|                                                  | 2004 | 6  | 17.299 ± 0.025 |
|                                                  | 2005 | 6  | 17.348 ± 0.025 |

|  |      |    |                |
|--|------|----|----------------|
|  | 2006 | 6  | 17.392 ± 0.025 |
|  | 2007 | 6  | 17.390 ± 0.025 |
|  | 2008 | 6  | 17.374 ± 0.025 |
|  | 2009 | 6  | 17.426 ± 0.025 |
|  | 2010 | 6  | 17.425 ± 0.025 |
|  | 2011 | 6  | 17.444 ± 0.025 |
|  | 2012 | 6  | 17.432 ± 0.025 |
|  | 1997 | 10 | 16.433 ± 0.025 |
|  | 1998 | 10 | 16.441 ± 0.025 |
|  | 1999 | 10 | 16.521 ± 0.025 |
|  | 2000 | 10 | 16.506 ± 0.025 |
|  | 2001 | 10 | 16.440 ± 0.025 |
|  | 2002 | 10 | 16.486 ± 0.025 |
|  | 2003 | 10 | 16.524 ± 0.025 |
|  | 2004 | 10 | 16.498 ± 0.025 |
|  | 2005 | 10 | 16.543 ± 0.025 |
|  | 2006 | 10 | 16.582 ± 0.025 |
|  | 2007 | 10 | 16.575 ± 0.025 |
|  | 2008 | 10 | 16.555 ± 0.025 |
|  | 2009 | 10 | 16.601 ± 0.025 |
|  | 2010 | 10 | 16.596 ± 0.025 |
|  | 2011 | 10 | 16.610 ± 0.025 |
|  | 2012 | 10 | 16.594 ± 0.025 |
|  | 1997 | 17 | 15.952 ± 0.026 |
|  | 1998 | 17 | 15.954 ± 0.025 |
|  | 1999 | 17 | 16.029 ± 0.025 |
|  | 2000 | 17 | 16.009 ± 0.025 |
|  | 2001 | 17 | 15.937 ± 0.025 |
|  | 2002 | 17 | 15.978 ± 0.025 |
|  | 2003 | 17 | 16.012 ± 0.025 |
|  | 2004 | 17 | 15.981 ± 0.025 |
|  | 2005 | 17 | 16.020 ± 0.025 |
|  | 2006 | 17 | 16.054 ± 0.025 |
|  | 2007 | 17 | 16.042 ± 0.025 |
|  | 2008 | 17 | 16.016 ± 0.025 |
|  | 2009 | 17 | 16.058 ± 0.025 |
|  | 2010 | 17 | 16.047 ± 0.025 |
|  | 2011 | 17 | 16.056 ± 0.025 |
|  | 2012 | 17 | 16.034 ± 0.025 |
