# Supplementary material
Source: PubMed Central journal article supplement (PMC4528479)
Supplement: rsbl20150310supp4.pdf [file rsbl20150310supp4.pdf]

Supplementary Table 3: Estimates of among-horse ( $V_H$ ) and residual ( $V_R$ ) variance in race time from mixed effect models of datasets. Also shown is the repeatability (R) calculated as the ratio of  $V_H$  to phenotypic variance (conditional on all fixed effects in the model, including year as a factor). Statistical inference on  $V_H$  is based on likelihood ratio comparison of full and reduced models (see text for details).

| Dataset | Years     | Classes | Runners | $V_H$       | $V_R$      | R            | $\chi^2_1$ | P      |
|---------|-----------|---------|---------|-------------|------------|--------------|------------|--------|
| 2.1)    | 1850-2012 | Elite   | Winners | 0.037±0.006 | 0.15±0.005 | 0.20±0.03    | 184.22     | <0.001 |
| 2.2)    | 1997-2012 | Elite   | Winners | 0.013±0.004 | 0.10±0.005 | 0.11±0.04    | 9.8        | 0.002  |
| 2.3)    | 1997-2012 | Elite   | All     | 0.019±0.002 | 0.16±0.002 | 0.11±0.008   | 317.58     | <0.001 |
| 2.4)    | 1997-2012 | All     | Winners | 0.016±0.001 | 0.13±0.001 | 0.11±0.005   | 746.3      | <0.001 |
| 2.5)    | 1997-2012 | All     | All     | 0.071±0.001 | 0.20±0.001 | 0.26 (0.002) | 10274.2    | <0.001 |
